# Supplementary material for: Machine Learning to Predict In-Hospital Mortality in COVID-19 Patients Using Computed Tomography-Derived Pulmonary and Vascular Features
Source: MDPI journal article supplement (doi:10.3390/jpm11060501), 2021-06-03
Supplement: s1 [file s1]

**Table S1.** Input features, hyperparameters and performance of the support vector machines developed as a result of the LASSO-importance-based backward feature selection.

| N <sub>if</sub> | Selected features                                                                                                                                                                                          | Hyperparameters |                       | Training<br>(10-fold CV) |                   |                   | Validation<br>(10-fold CV) |                   |                   | Training/validation |       |       | Testing |       |       |
|-----------------|------------------------------------------------------------------------------------------------------------------------------------------------------------------------------------------------------------|-----------------|-----------------------|--------------------------|-------------------|-------------------|----------------------------|-------------------|-------------------|---------------------|-------|-------|---------|-------|-------|
|                 |                                                                                                                                                                                                            | Final C         | Final $\gamma$        | AUC                      | Pr                | Rc                | AUC                        | Pr                | Rc                | AUC                 | Pr    | Rc    | AUC     | Pr    | Rc    |
| 14              | Male sex, age, GGOs, consolidations, crazy paving, bilaterality, lung opacity extent, PA diameter, AA diameter, PA/AA, cardiovascular disease, diabetes, oncological history, chronic kidney insufficiency | 7.258           | $5.52 \times 10^{-5}$ | $0.814 \pm 0.006$        | $0.492 \pm 0.013$ | $0.774 \pm 0.025$ | $0.802 \pm 0.052$          | $0.506 \pm 0.080$ | $0.769 \pm 0.115$ | 0.726               | 0.494 | 0.750 | 0.754   | 0.533 | 0.800 |
| 10              | Male sex, age, consolidations, crazy paving, lung opacity extent, PA diameter, AA diameter, cardiovascular disease, oncological history, chronic kidney insufficiency                                      | 5.924           | $6.06 \times 10^{-5}$ | $0.817 \pm 0.006$        | $0.499 \pm 0.014$ | $0.806 \pm 0.022$ | $0.806 \pm 0.047$          | $0.509 \pm 0.076$ | $0.794 \pm 0.101$ | 0.752               | 0.500 | 0.825 | 0.747   | 0.522 | 0.800 |
| 9               | Age, consolidations, crazy paving, lung opacity extent, PA diameter, AA diameter, cardiovascular disease, oncological history, chronic kidney insufficiency                                                | 4.258           | $9.70 \times 10^{-5}$ | $0.817 \pm 0.005$        | $0.499 \pm 0.014$ | $0.793 \pm 0.028$ | $0.806 \pm 0.047$          | $0.511 \pm 0.065$ | $0.800 \pm 0.096$ | 0.746               | 0.487 | 0.831 | 0.747   | 0.522 | 0.800 |
| 8               | Age, consolidations, crazy paving, lung opacity extent, PA diameter, AA diameter, oncological history, chronic kidney insufficiency                                                                        | 6.258           | $5.52 \times 10^{-5}$ | $0.822 \pm 0.006$        | $0.479 \pm 0.023$ | $0.765 \pm 0.053$ | $0.812 \pm 0.050$          | $0.499 \pm 0.085$ | $0.775 \pm 0.109$ | 0.717               | 0.492 | 0.725 | 0.789   | 0.600 | 0.800 |
| 7               | Age, consolidations, crazy paving, lung opacity extent, PA diameter, AA diameter, oncological history                                                                                                      | 5.758           | $2.26 \times 10^{-4}$ | $0.829 \pm 0.007$        | $0.492 \pm 0.012$ | $0.746 \pm 0.014$ | $0.819 \pm 0.054$          | $0.499 \pm 0.092$ | $0.738 \pm 0.096$ | 0.728               | 0.498 | 0.750 | 0.792   | 0.581 | 0.833 |
| 6               | Age, consolidations, crazy paving, lung opacity extent, PA diameter, oncological history                                                                                                                   | 8.091           | $2.48 \times 10^{-4}$ | $0.832 \pm 0.007$        | $0.505 \pm 0.012$ | $0.775 \pm 0.025$ | $0.821 \pm 0.057$          | $0.500 \pm 0.073$ | $0.763 \pm 0.092$ | 0.737               | 0.500 | 0.775 | 0.772   | 0.590 | 0.767 |

|   |                                                                          |       |                           |                  |                  |                  |                  |                  |                  |       |       |       |       |       |       |
|---|--------------------------------------------------------------------------|-------|---------------------------|------------------|------------------|------------------|------------------|------------------|------------------|-------|-------|-------|-------|-------|-------|
| 5 | Age, crazy paving, lung opacity extent, PA diameter, oncological history | 6.758 | 7.32<br>×10 <sup>-5</sup> | 0.820 ±<br>0.006 | 0.520 ±<br>0.023 | 0.701 ±<br>0.041 | 0.809 ±<br>0.055 | 0.533 ±<br>0.084 | 0.713 ±<br>0.085 | 0.732 | 0.509 | 0.744 | 0.746 | 0.583 | 0.700 |
| 4 | Age, crazy paving, lung opacity extent, PA diameter                      | 4.758 | 1.55×10 <sup>-4</sup>     | 0.819 ±<br>0.006 | 0.502 ±<br>0.013 | 0.742 ±<br>0.022 | 0.811 ±<br>0.055 | 0.517 ±<br>0.064 | 0.750 ±<br>0.112 | 0.724 | 0.494 | 0.744 | 0.765 | 0.575 | 0.767 |
| 3 | Age, lung opacity extent, PA diameter                                    | 4.591 | 1.17<br>×10 <sup>-4</sup> | 0.814 ±<br>0.006 | 0.464 ±<br>0.011 | 0.800 ±<br>0.035 | 0.810 ±<br>0.058 | 0.475 ±<br>0.070 | 0.800 ±<br>0.073 | 0.713 | 0.467 | 0.763 | 0.754 | 0.533 | 0.800 |
| 2 | Age, lung opacity extent                                                 | 7.758 | 2.48×10 <sup>-4</sup>     | 0.812 ±<br>0.006 | 0.469 ±<br>0.013 | 0.838 ±<br>0.010 | 0.808 ±<br>0.052 | 0.469 ±<br>0.060 | 0.838 ±<br>0.089 | 0.737 | 0.475 | 0.831 | 0.774 | 0.531 | 0.867 |
| 1 | Age                                                                      | 7.258 | 2.48×10 <sup>-4</sup>     | 0.774 ±<br>0.005 | 0.426 ±<br>0.004 | 0.862 ±<br>0.013 | 0.773 ±<br>0.049 | 0.429 ±<br>0.035 | 0.863 ±<br>0.073 | 0.702 | 0.427 | 0.844 | 0.725 | 0.464 | 0.867 |

All models used a radial basis function kernel. Hyperparameters were optimized using a systematic grid search combined with a 10-fold cross-validation. CV: cross-validation; AUC: area under the curve; Nr: number of input features; Pr: precision; Rc: recall.
